## ■ R E T R A C T I O N

# Sepsis induces the transcription of the glucocorticoid receptor in skeletal muscle cells

**Xiaoyan SUN, Joshua M. V. MAMMEN and Xintian TIAN**

Volume 105 (2003), pp. 383–391

The Investigation Committee at the University of Cincinnati (the sponsoring Institution of the research) has retracted the above paper.
